# Supplementary material for: miR-629-3p may serve as a novel biomarker and potential therapeutic target for lung metastases of triple-negative breast cancer
Source: PubMed Central journal article supplement (PMC5477310; doi:10.1186/s13058-017-0865-y), 2017-06-19
Supplement: 13058_2017_865_MOESM2_ESM.pdf [file 13058_2017_865_MOESM2_ESM.pdf]

## anti-miR-629 vectors (Lv-anti-miR-629)

**GeneCopoeia™**  
Expressway to Discovery

9620 Medical Center Drive, Suite 101  
Rockville, MD 20850  
Tel: 301-762-8888  
Email: sales@genecopoeia.com

### miArrest™ miRNA inhibitor Expression Clone Datasheet

#### Clone Information

Catalog No.: HmiR0256-HR03  
Mature miRNA Name: hsa-miR-629-3p  
Mature miRNA Accession No.: MIMAT0003298  
Mature miRNA Sequence: GUUCUCCCAACGUAAGCCCCAGC

Whole Plasmid Size: 8938 bp  
Antibiotic: Ampicillin  
Reporter Gene: mCherry Fluorescent Protein  
Promoter: H1

#### Vector Information

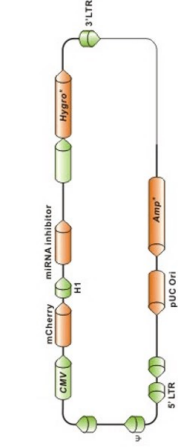

#### Representative structure of miArrest™ miRNA inhibitor

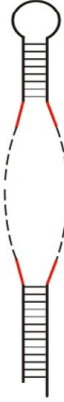

## Scramble 1 vector (Lv-Scr 1)

**GeneCopoeia™**  
Expressway to Discovery

9620 Medical Center Drive, Suite 101  
Rockville, MD 20850  
Tel: 301-762-8888  
Email: sales@genecopoeia.com

### miArrest™ miRNA inhibitor Expression Clone Datasheet

#### Clone Information

Catalog No.: CmiR-AN0001-AM03  
Description: miRNA inhibitor control

Whole Plasmid Size: 8936 bp  
Stable Selection Marker : Hygromycin  
Antibiotic: Ampicillin  
Reporter Gene: mCherry Fluorescent Protein  
Cloning Site at 5': BamHI  
Cloning Site at 3': EcoRI

#### Vector Information

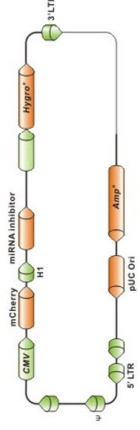

#### Representative structure of miArrest™ miRNA inhibitor

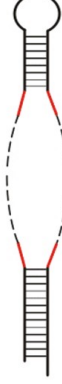

#### General Information:

IN-2020

## pre-miR-629 vectors (Lv-miR-629)

**GeneCopoeia™**  
Expressway to Discovery

9620 Medical Center Drive, Suite 101  
Rockville, MD 20850  
Tel: 301-762-8888  
Email: sales@genecopoeia.com

### miExpress™ Precursor miRNA Expression Clone Datasheet

#### Clone Information

Catalog No.: HmiR0256-HR03  
Precursor miRNA Accession: MIM003643  
Description: Homo sapiens miR-629 stem-loop  
Whole Plasmid Size: 8142 bp  
Antibiotic: Ampicillin  
Reporter Gene: eGFP

Precursor Sequence: jccuuucccaggaggaggcugguuuacguuggagaacuuuuacggaccaggagguucucccaacguagccca

5' LTR and Packaging Elements

3' LTR

polyA

Puromycin

mCherry

miRNA

eGFP

pUC Ori

Ampicillin

CMV

5' LTR and Packaging Elements

3' LTR

polyA

Puromycin

mCherry

miRNA

eGFP

pUC Ori

Ampicillin

CMV

5' LTR and Packaging Elements

3' LTR

polyA

Puromycin

mCherry

miRNA

eGFP

pUC Ori

Ampicillin

CMV

5' LTR and Packaging Elements

3' LTR

polyA

Puromycin

mCherry

miRNA

eGFP

pUC Ori

Ampicillin

CMV

5' LTR and Packaging Elements

3' LTR

polyA

Puromycin

mCherry

miRNA

eGFP

pUC Ori

Ampicillin

CMV

5' LTR and Packaging Elements

3' LTR

polyA

Puromycin

mCherry

miRNA

eGFP

pUC Ori

Ampicillin

CMV

5' LTR and Packaging Elements

3' LTR

polyA

Puromycin

mCherry

miRNA

eGFP

pUC Ori

Ampicillin

CMV

5' LTR and Packaging Elements

3' LTR

polyA

Puromycin

mCherry

miRNA

eGFP

pUC Ori

Ampicillin

CMV

5' LTR and Packaging Elements

3' LTR

polyA

Puromycin

mCherry

miRNA

eGFP

pUC Ori

Ampicillin

CMV

5' LTR and Packaging Elements

3' LTR

polyA

Puromycin

mCherry

miRNA

eGFP

pUC Ori

Ampicillin

CMV

5' LTR and Packaging Elements

3' LTR

polyA

Puromycin

mCherry

miRNA

eGFP

pUC Ori

Ampicillin

CMV

5' LTR and Packaging Elements

3' LTR

polyA

Puromycin

mCherry

miRNA

eGFP

pUC Ori

Ampicillin

CMV

5' LTR and Packaging Elements

3' LTR

polyA

Puromycin

mCherry

miRNA

eGFP

pUC Ori

Ampicillin

CMV

5' LTR and Packaging Elements

3' LTR

polyA

Puromycin

mCherry

miRNA

eGFP

pUC Ori

Ampicillin

CMV

5' LTR and Packaging Elements

3' LTR

polyA

Puromycin

mCherry

miRNA

eGFP

pUC Ori

Ampicillin

CMV

5' LTR and Packaging Elements

3' LTR

polyA

Puromycin

mCherry

miRNA

eGFP

pUC Ori

Ampicillin

CMV

5' LTR and Packaging Elements

3' LTR

polyA

Puromycin

mCherry

miRNA

eGFP

pUC Ori

Ampicillin

CMV

5' LTR and Packaging Elements

3' LTR

polyA

Puromycin

mCherry

miRNA

eGFP

pUC Ori

Ampicillin

CMV

5' LTR and Packaging Elements

3' LTR

polyA

Puromycin

mCherry

miRNA

eGFP

pUC Ori

Ampicillin

CMV

5' LTR and Packaging Elements

3' LTR

polyA

Puromycin

mCherry

miRNA

eGFP

pUC Ori

Ampicillin

CMV

5' LTR and Packaging Elements

3' LTR

polyA

Puromycin

mCherry

miRNA

eGFP

pUC Ori

Ampicillin

CMV

5' LTR and Packaging Elements

3' LTR

polyA

Puromycin

mCherry

miRNA

eGFP

pUC Ori

Ampicillin

CMV

5' LTR and Packaging Elements

3' LTR

polyA

Puromycin

mCherry

miRNA

eGFP

pUC Ori

Ampicillin

CMV

5' LTR and Packaging Elements

3' LTR

polyA

Puromycin

mCherry

miRNA

eGFP

pUC Ori

Ampicillin

CMV

5' LTR and Packaging Elements

3' LTR

polyA

Puromycin

mCherry

miRNA

eGFP

pUC Ori

Ampicillin

CMV
