# Supplementary material for: miR-629-3p may serve as a novel biomarker and potential therapeutic target for lung metastases of triple-negative breast cancer
Source: PubMed Central journal article supplement (PMC5477310; doi:10.1186/s13058-017-0865-y), 2017-06-19
Supplement: 13058_2017_865_MOESM3_ESM.pdf [file 13058_2017_865_MOESM3_ESM.pdf]

**Table S1 Characteristics of patients with TNBC in training set and validation set**

| Variables    | Training Set              |                           |      | Validation Set |      | P     |
|--------------|---------------------------|---------------------------|------|----------------|------|-------|
|              | Lung-metastasis<br>(n=68) | Recurrence-free<br>(n=68) | %    | n=525          | %    |       |
| Age (years)  |                           |                           |      |                |      | 0.228 |
| <35          | 6                         | 12                        | 13.2 | 72             | 13.7 |       |
| 35-65        | 60                        | 53                        | 83.1 | 412            | 78.5 |       |
| >65          | 2                         | 3                         | 3.7  | 41             | 7.8  |       |
| Menopause    |                           |                           |      |                |      | 0.517 |
| No           | 39                        | 47                        | 63.2 | 316            | 60.2 |       |
| Yes          | 29                        | 21                        | 36.8 | 209            | 39.8 |       |
| T            |                           |                           |      |                |      | 0.537 |
| T1           | 15                        | 28                        | 31.6 | 187            | 35.6 |       |
| T2           | 36                        | 35                        | 52.2 | 262            | 49.9 |       |
| T3           | 14                        | 3                         | 12.5 | 49             | 9.3  |       |
| T4           | 3                         | 2                         | 3.7  | 27             | 5.1  |       |
| N            |                           |                           |      |                |      | 0.120 |
| N0           | 8                         | 40                        | 35.3 | 238            | 45.3 |       |
| N1           | 21                        | 18                        | 28.7 | 146            | 27.8 |       |
| N2           | 17                        | 6                         | 16.9 | 70             | 13.3 |       |
| N3           | 22                        | 4                         | 19.1 | 71             | 13.5 |       |
| TNM stage    |                           |                           |      |                |      | 0.194 |
| I            | 5                         | 23                        | 20.6 | 123            | 23.4 |       |
| II           | 20                        | 33                        | 39.0 | 233            | 44.4 |       |
| III          | 43                        | 12                        | 40.4 | 169            | 32.2 |       |
| Surgery      |                           |                           |      |                |      | 0.603 |
| BCS          | 11                        | 14                        | 18.4 | 107            | 20.4 |       |
| Mastectomy   | 57                        | 54                        | 81.6 | 418            | 79.6 |       |
| Chemotherapy |                           |                           |      |                |      | 0.093 |
| No           | 5                         | 3                         | 5.9  | 56             | 10.7 |       |
| Yes          | 63                        | 65                        | 94.1 | 469            | 89.3 |       |
| Grade        |                           |                           |      |                |      | 0.277 |
| I            | 7                         | 10                        | 12.5 | 85             | 16.2 |       |
| II           | 24                        | 25                        | 36.0 | 208            | 39.6 |       |
| III          | 37                        | 33                        | 51.5 | 232            | 44.2 |       |
| Ki-67        |                           |                           |      |                |      | 0.999 |
| ≤14%         | 10                        | 26                        | 26.5 | 139            | 26.5 |       |
| >14%         | 58                        | 42                        | 73.5 | 386            | 73.5 |       |
| LVI          |                           |                           |      |                |      | 0.258 |
| Negative     | 43                        | 64                        | 78.7 | 435            | 82.9 |       |
| Positive     | 25                        | 4                         | 21.3 | 90             | 17.1 |       |
