# Supplementary material for: miR-629-3p may serve as a novel biomarker and potential therapeutic target for lung metastases of triple-negative breast cancer
Source: Breast Cancer Res. 2017 Jun 19;19:72. doi: 10.1186/s13058-017-0865-y (PMC5477310; doi:10.1186/s13058-017-0865-y)

**GeneCopoeia™**  
*Expressway to Discovery*

Fax: 301-762-3888  
Web: [www.genecopoeia.com](http://www.genecopoeia.com)  
Email: [sales@genecopoeia.com](mailto:sales@genecopoeia.com)

Copyright © 2010 GeneCopoeia Inc.

**GeneCopoeia™**  
Expressway to Discovery

[www.genecopoeia.com](http://www.genecopoeia.com)

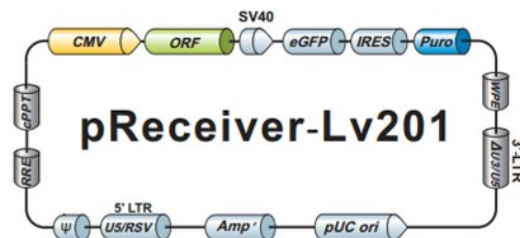

**GeneCopoeia™**  
Expressway to Discovery

Fax: 301-762-3888  
Web: [www.genecopoeia.com](http://www.genecopoeia.com)  
Email: [sales@genecopoeia.com](mailto:sales@genecopoeia.com)

Copyright © 2012 GeneCopoeia Inc.  
MIO-041712

**GeneCopoeia™**  
Expressway to Discovery

[www.genecopoeia.com](http://www.genecopoeia.com)

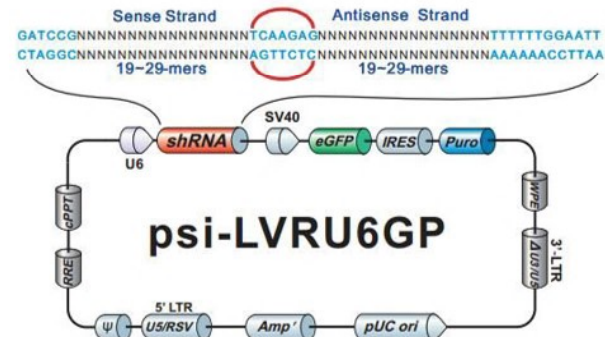

Supplement: Supplementary file 1 — Sequences and structures of miR-629-3p mimics, inhibitor of miR-629-3p, and LIFR-expressing and LIFR-interfering lentivirus plasmids. (PDF 280 kb) [file 13058_2017_865_MOESM1_ESM.pdf]
